# Supplementary material
Source: publisher site journal article supplement (https://www.dovepress.com/article/480718)
Supplement: Supplementary file 1 [file get_supplementary_file.php]

**Table S1. Sensitivity Analysis of Longitudinal Utilization of Invasive Pain Treatment Procedures Following Use of Whole Health and Conventional Care**

|  | **Any Spine Procedure** | **Nonsurgical Procedures** | **Spine Surgeries** | **Spinal Cord Stimulators** |
| --- | --- | --- | --- | --- |
| **0–3 Months** | | | | |
| Observed Events (Whole Health), *n* | 38 | 36 | 2 | 0 |
| Counterfactual Events (Regression), *n* (95% CI) | 60 (53 to 75) | 53 (48 to 67) | 4 (3 to 5) | ---* |
| Difference (Regression), % (95% CI) | -36% (-55% to -12%) | -33% (-53% to -4%) | -50% (-100% to 25%) | ---* |
| Counterfactual Events (Matching), *n* (95% CI) | 65 (57 to 74) | 60 (52 to 69) | 4 (2 to 6) | ---* |
| Difference (Matching), % (95% CI) | -42% (-61% to -17%) | -40% (-59% to -13%) | -47% (-100% to 67%) | ---* |
| **4–12 Months** | | | | |
| Observed Events (Whole Health), *n* | 119 | 101 | 8 | 10 |
| Counterfactual Events (Regression), *n* (95% CI) | 141 (125 to 172) | 126 (113 to 155) | 10 (9 to 12) | 5 (4 to 8) |
| Difference (Regression), % (95% CI) | -16% (-37% to 2%) | -20% (-41% to 0%) | -21% (-77% to 46%) | 94% (-77% to 236%) |
| Counterfactual Events (Matching), *n* (95% CI) | 158 (141 to 177) | 140 (126 to 156) | 11 (8 to 14) | 7 (4 to 10) |
| Difference (Matching), % (95% CI) | -25% (-43% to -4%) | -28% (-49% to -8%) | -25% (-76% to 50%) | 43% (-69% to 222%) |
| **13–18 Months** | | | | |
| Observed Events (Whole Health), *n* | 72 | 62 | 8 | 2 |
| Counterfactual Events (Regression), *n* (95% CI) | 83 (75 to 100) | 76 (68 to 92) | 5 (4 to 6) | 3 (2 to 4) |
| Difference (Regression), % (95% CI) | -13% (-39% to 11%) | -18% (-46% to 5%) | 53% (-54% to 209%) | -27% (-100% to 157%) |
| Counterfactual Events – Matching, *n* (95% CI) | 84 (73 to 96) | 75 (65 to 84) | 5 (3 to 8) | 3 (2 to 5) |
| Difference (Matching), % (95% CI) | -14% (-37% to 19%) | -18% (-43% to 15%) | 54% (-57% to 254%) | -41% (-100% to 159%) |
| **0–18 Months** | | | | |
| Observed Events (Whole Health), *n* | 229 | 199 | 18 | 12 |
| Counterfactual Events (Regression), *n* (95% CI) | 298 (265 to 360) | 269 (240 to 331) | 19 (17 to 22) | 11 (8 to 16) |
| Difference (Regression), % (95% CI) | -23% (-39% to -8%) | -26% (-42% to -10%) | -8% (-49% to 41%) | 13% (-78% to 88%) |
| Counterfactual Events (Matching), *n* (95% CI) | 294 (267 to 318) | 258 (234 to 282) | 22 (17 to 26) | 13 (9 to 18) |
| Difference (Matching), % (95% CI) | -22% (-39% to -5%) | -23% (-41% to -4%) | -17% (-59% to 36%) | -10% (-75% to 82%) |
| *Not enough outcomes observed in either Whole Health cohort, Conventional Care cohort, or both: analysis was not performed. | | | | |

**Table S2. Sensitivity Analysis of Longitudinal Utilization of Invasive Pain Treatment Procedures Following Use of CIH Therapies and Conventional Care**

|  | **Any Spine Procedure** | **Nonsurgical Procedures** | **Spine Surgeries** | **Spinal Cord Stimulators** |
| --- | --- | --- | --- | --- |
| **0–3 Months** | | | | |
| Observed Events (CIH Cohort), *n* | 339 | 285 | 44 | 10 |
| Counterfactual Events (Regression), *n* (95% CI) | 444 (422 to 491) | 392 (371 to 437) | 34 (30 to 40) | 25 (16 to 88) |
| Difference (Regression), % (95% CI) | -24% (-34% to -11%) | -27% (-36% to -15%) | 29% (-42% to 117%) | -61% (-92% to -32%) |
| Counterfactual Events (Matching), *n* (95% CI) | 413 (392 to 433) | 366 (346 to 385) | 33 (27 to 38) | 14 (10 to 19) |
| Difference (Matching), % (95% CI) | -18% (-29% to -4%) | -22% (-33% to -10%) | 34% (-33% to 131%) | -31% (-69% to 34%) |
| **4–12 Months** | | | | |
| Observed Events (CIH Cohort), *n* | 976 | 845 | 88 | 43 |
| Counterfactual Events (Regression), *n* (95% CI) | 1,048 (991 to 1,142) | 933 (880 to 1,022) | 75 (66 to 82) | 54 (41 to 99) |
| Difference (Regression), % (95% CI) | -7% (-14% to 5%) | -9% (-17% to 1%) | 18% (-9% to 57%) | -20% (-58% to 38%) |
| Counterfactual Events (Matching), *n* (95% CI) | 932 (891 to 981) | 831 (795 to 867) | 69 (62 to 76) | 32 (26 to 39) |
| Difference (Matching), % (95% CI) | 5% (-5% to 15%) | 2% (-9% to 13%) | 28% (-6% to 75%) | 34% (-24% to 95%) |
| **13–18 Months** | | | | |
| Observed Events (CIH Cohort), *n* | 615 | 544 | 51 | 20 |
| Counterfactual Events (Regression), *n* (95% CI) | 601 (576 to 664) | 543 (520 to 600) | 38 (32 to 43) | 26 (19 to 39) |
| Difference (Regression), % (95% CI) | 2% (-7% to 17%) | 0% (-9% to 16%) | 35% (-11% to 85%) | -22% (-59% to 35%) |
| Counterfactual Events (Matching), *n* (95% CI) | 568 (539 to 595) | 510 (484 to 537) | 39 (33 to 45) | 19 (15 to 24) |
| Difference (Matching), % (95% CI) | 8% (-4% to 22%) | 7% (-6% to 20%) | 32% (-13% to 85%) | 4% (-52% to 69%) |
| **0–18 Months** | | | | |
| Observed Events (CIH Cohort), *n* | 1,922 | 1,667 | 182 | 73 |
| Counterfactual Events (Regression), *n* (95% CI) | 2,218 (2,114 to 2,425) | 1,988 (1,886 to 2,190) | 146 (133 to 157) | 110 (90 to 190) |
| Difference (Regression), % (95% CI) | -13% (-19% to -4%) | -16% (-22% to -7%) | 24% (1% to 57%) | -33% (-62% to -4%) |
| Counterfactual Events (Matching), *n* (95% CI) | 1,936 (1,860 to 2,006) | 1,726 (1,658 to 1,798) | 144 (132 to 156) | 65 (57 to 76) |
| Difference (Matching), % (95% CI) | -1% (-9% to 9%) | -3% (-13% to 7%) | 26% (-1% to 58%) | 12% (-21% to 54%) |
